# Supplementary material
Source: PubMed Central journal article supplement (PMC2275038)
Supplement: blood_blood-2007-06-097188_1.pdf [file blood_blood-2007-06-097188_1.pdf]

| Patient # | Sex (F or M) | Age (Sample Obtained) | CoW Disease | Diagnostic Tests (TCD, MRA, Stroke) |
|-----------|--------------|-----------------------|-------------|-------------------------------------|
| N1        | F            | 11                    | -           | No Stroke, Normal MRA               |
| N2        | M            | 15                    | -           | No Stroke, Normal MRA               |
| N3        | M            | 8                     | -           | No Stroke, Normal TCD               |
| N4        | M            | 15                    | -           | No Stroke, Normal TCD               |
| N5        | F            | 14                    | -           | No Stroke, Normal TCD               |
| N6        | M            | 15                    | -           | No Stroke, Normal MRA               |
| N7        | M            | 17                    | -           | No Stroke, Normal MRA               |
| N8        | F            | 14                    | -           | No Stroke, Normal MRA               |
| N9        | M            | 15                    | -           | No Stroke, Normal TCD               |
| A1        | M            | 12                    | +           | Clinical Stroke, Abnormal MRA       |
| A2        | F            | 10                    | +           | Clinical Stroke                     |
| A3        | F            | 4                     | +           | Clinical Stroke                     |
| A4        | M            | 13                    | +           | Clinical Stroke                     |
| A5        | F            | 9                     | +           | Clinical Stroke                     |
| A6        | F            | 19                    | +           | Clinical Stroke                     |
| A8        | M            | 12                    | +           | Clinical Stroke, Abnormal MRA       |
| A9        | F            | 13                    | +           | Abnormal MRA                        |
| A10       | M            | 12                    | +           | Clinical Stroke, Abnormal MRA       |
| A11       | F            | 16                    | +           | Abnormal MRA                        |
| A12       | M            | 18                    | +           | Clinical Stroke                     |
